# Supplementary material for: An IQ Domain Mediates the Interaction with Calmodulin in a Plant Cyclic Nucleotide-Gated Channel
Source: PubMed Central journal article supplement — Plant Cell Physiol. 2013 Mar 13;54(4):573–84. doi: 10.1093/pcp/pct021 (PMC3612182; doi:10.1093/pcp/pct021), 2013-03-13
Supplement: supp_pct021_pcp-2012-e-00511-File011.pdf [file supp_pct021_pcp-2012-e-00511-File011.pdf]

**Table S1** Primer used for cloning.

| Primer | Sequence 5'-3'                                                     | Cloning of                                               |
|--------|--------------------------------------------------------------------|----------------------------------------------------------|
| 1      | CACCATGGCTTCCCACAACGAA                                             | CNGC20                                                   |
| 2      | CTAAAGGCTATAACTAGACTGAGGAGTG                                       | CNGC20+stop, CNGC20-CC, CNGC20-C                         |
| 3      | AAGGCTATAACTAGACTGAGGAGTGCA                                        | CNGC20-stop                                              |
| 4      | CACCATGGCTCTTGGTAAAA                                               | CNGC20-C, CNGC20-C- $\Delta$ C63, CNGC20-C- $\Delta$ C34 |
| 5      | AAGCTTAAGGCTATAACTAGAC                                             | CNGC20-C-stop                                            |
| 6      | GGATCMCAGCGAAAACGCCTCCACATT                                        | CNGC20-C- $\Delta$ C63                                   |
| 7      | GGATCMAGAGTCGTACCTTATGGCTCCTTG                                     | CNGC20-C- $\Delta$ C34                                   |
| 8      | CTAGTCGTACCTTATGGCTCCTTG                                           | CNGC20- $\Delta$ C34                                     |
| 9      | CACCATGGCGTTTTTCGCTGAGTGTAG                                        | CNGC20- $\alpha$ B/C                                     |
| 10     | TCATGGAGAGTCGTACCTTATGGC                                           | CNGC20- $\alpha$ B/C                                     |
| 11     | CACCATGTCTCCATATTGGAGGCTACGAGCG                                    | CNGC20-CC                                                |
| 12     | CACCATGTTTTCGAGATTCTTGA                                            | CNGC20- $\alpha$ C                                       |
| 13     | CTATCGTAGCCTCCAATATGGAG                                            | CNGC20- $\alpha$ C                                       |
| 14     | CACCATGGCGGCTAGGCAGATTCAAG                                         | CNGC20-IQ                                                |
| 15     | CTAAAGCCGTCTCCTACGGTATC                                            | CNGC20-IQ                                                |
| 16     | CACCATGGCGGATCAGCTCACAGA                                           | CaM2-stop                                                |
| 17     | <u>GGATCC</u> CTTAGCCATCATAACCT                                    | CaM2-stop                                                |
| 18     | CACCATGGCGGATCAGCTAACTGA                                           | CaM4                                                     |
| 19     | GGATCMTCACTTAGCCATCATAATCT                                         | CaM4                                                     |
| 20     | CACCATGGCGGATCAGCTCACC                                             | CaM6                                                     |
| 21     | TCACTTAGCCATCATG                                                   | CaM6                                                     |
| 22     | CACCATGGCGGATCAGCTAAC                                              | CaM7                                                     |
| 23     | TCACTTTGCCATCATG                                                   | CaM7                                                     |
| 24     | CACCATGGAAGAAACAGCACTGAC                                           | CML8                                                     |
| 25     | GGATCMGTCAATGTTGATCATCATCTTG                                       | CML8                                                     |
| 26     | CACCATGGCGGATGCTTTCA                                               | CML9                                                     |
| 27     | GGATCMATAAGAGGCAGCA                                                | CML9                                                     |
| 28     | GGCGCGCCATGGTGAGCAAGGGCGAGGAG                                      | mCherry                                                  |
| 29     | GGCGCGCCTTCGAACTAGTTGTACAGCTCGTCCA<br>TGCCG                        | mCherry                                                  |
| 30     | TGAGAATATTTTCGTTGATGGATGAACC                                       | MBP-CNGC20-C                                             |
| 31     | CGCCCAAGCTTCTAAAGGCTATAAC                                          | MBP-CNGC20-C                                             |
| 32     | GGATCCCATGGCGGATCAGCTCAC                                           | Strep-CaM2                                               |
| 33     | CTGCAGTCACTTAGCCATCATAACC                                          | Strep-CaM3                                               |
| 34     | GGCGTGGAGATACGCTGCAGCACGGCTTCATAG<br>ATTATGCACTCCTCAGTCTAGTTATAGCC | Mutation of NLS in CNGC20                                |
| 35     | GGCTATAACTAGACTGAGGAGTGCATAATCTATG<br>AAGCCGTGCTGCAGCGTATCTCCACGCC | Mutation of NLS in CNGC20                                |
